# Supplementary material for: Evaluation of the European Committee on Antimicrobial Susceptibility Testing Guidelines for Rapid Antimicrobial Susceptibility Testing of Bacillus anthracis-, Yersinia pestis- and Francisella tularensis-Positive Blood Cultures
Source: MDPI journal article supplement (doi:10.3390/microorganisms9051055), 2021-05-13
Supplement: s1 [file s1]

**Table S1.** Tetracycline inhibition zone diameters of *B. anthracis*-positive blood cultures

| Incubation duration (h) | Inhibition zone diameter (mm) |              |                                                |                                          |
|-------------------------|-------------------------------|--------------|------------------------------------------------|------------------------------------------|
|                         | Standard culture <sup>a</sup> | at the alert | 18 h after the alert, incubation in the device | 3 h after the alert, at room temperature |
| 6                       | 25-26                         | 26-27        | 28                                             | 26                                       |
| 8                       | 27-28                         | 28-30        | 29-30                                          | 27                                       |
| 16                      | 30                            | 29-30        | ND                                             | ND                                       |
| 18                      | 30                            | 27-30        | ND                                             | ND                                       |
| 20                      | 30                            | 27-30        | ND                                             | ND                                       |
| 23                      | 29-30                         | 27-30        | 28-30                                          | 27-28                                    |

<sup>a</sup> Tetracycline inhibition zone diameters for the standard culture were taken from Table 2

ND - Not Determined

The inhibition-zone diameters were determined by at least three independent assays

**Table S2.** Penicillin G inhibition zone diameters of *B. anthracis*-positive blood cultures

| Incubation duration (h) | Inhibition zone diameter (mm) |              |                                                |                                          |
|-------------------------|-------------------------------|--------------|------------------------------------------------|------------------------------------------|
|                         | Standard culture <sup>a</sup> | at the alert | 18 h after the alert, incubation in the device | 3 h after the alert, at room temperature |
| 6                       | 19-20                         | 20-22        | 19-21                                          | 18-19                                    |
| 8                       | 20                            | 20-22        | 19-21                                          | 19                                       |
| 16                      | 21                            | 20-21        | ND                                             | ND                                       |
| 18                      | 21                            | 19-21        | ND                                             | ND                                       |
| 20                      | 21                            | 19-21        | ND                                             | ND                                       |
| 23                      | 20-21                         | 19-22        | 19-21                                          | 18-20                                    |

<sup>a</sup> Penicillin G inhibition zone diameter for the standard culture were taken from Table 2

ND - Not Determined

The inhibition-zone diameters were determined by at least three independent assays

**Table S3.** Amoxicillin-Clavulanic acid inhibition zone diameters of *B. anthracis*-positive blood cultures

| Incubation duration (h) | Inhibition zone diameter (mm) |              |                                                |                                          |
|-------------------------|-------------------------------|--------------|------------------------------------------------|------------------------------------------|
|                         | Standard culture <sup>a</sup> | at the alert | 18 h after the alert, incubation in the device | 3 h after the alert, at room temperature |
| 6                       | 28                            | 27-30        | 28-29                                          | 25-26                                    |
| 8                       | 30                            | 29-30        | 29-30                                          | 27-28                                    |
| 16                      | 31                            | 30-32        | ND                                             | ND                                       |
| 18                      | 32                            | 30-32        | ND                                             | ND                                       |
| 20                      | 33                            | 30-32        | ND                                             | ND                                       |
| 23                      | 30-33                         | 30-32        | 29-32                                          | 27-30                                    |

<sup>a</sup> Amoxicillin-Clavulanic acid inhibition zone diameters for the standard culture were taken from Table 2

ND - Not Determined

The inhibition-zone diameters were determined by at least three independent assays

**Table S4.** Linezolid inhibition zone diameters of *B. anthracis*-positive blood cultures

| Incubation duration (h) | Inhibition zone diameter (mm) |              |                                                |                                          |
|-------------------------|-------------------------------|--------------|------------------------------------------------|------------------------------------------|
|                         | Standard culture <sup>a</sup> | at the alert | 18 h after the alert, incubation in the device | 3 h after the alert, at room temperature |
| 6                       | 21                            | 22-25        | 26-28                                          | 26-27                                    |
| 8                       | 30                            | 28-30        | 26-28                                          | 26-27                                    |
| 16                      | 28                            | 29-30        | ND                                             | ND                                       |
| 18                      | 28                            | 28-30        | ND                                             | ND                                       |
| 20                      | 28                            | 28-30        | ND                                             | ND                                       |
| 23                      | 28-30                         | 28-32        | 27-30                                          | 26-28                                    |

<sup>a</sup> Linezolid inhibition zone diameter for the standard culture were taken from Table 2

ND - Not Determined

The inhibition-zone diameters were determined by at least three independent assays

**Table S5.** Moxifloxacin inhibition zone diameters of *B. anthracis*-positive blood cultures

| Incubation duration (h) | Inhibition zone diameter (mm) |              |                                                |                                          |
|-------------------------|-------------------------------|--------------|------------------------------------------------|------------------------------------------|
|                         | Standard culture <sup>a</sup> | at the alert | 18 h after the alert, incubation in the device | 3 h after the alert, at room temperature |
| 6                       | 17                            | 17-19        | 18-19                                          | 13-17                                    |
| 8                       | 17                            | 20-21        | 19-20                                          | 17-18                                    |
| 16                      | 23                            | 21-23        | ND                                             | ND                                       |
| 18                      | 23                            | 21-23        | ND                                             | ND                                       |
| 20                      | 23                            | 21-23        | ND                                             | ND                                       |
| 23                      | 23                            | 21-23        | 19-22                                          | 19                                       |

<sup>a</sup> Moxifloxacin inhibition zone diameter for the standard culture were taken from Table 2

ND - Not Determined

The inhibition-zone diameters were determined by at least three independent assays

**Table S6.** Levofloxacin inhibition zone diameters of *B. anthracis*-positive blood cultures

| Incubation duration (h) | Inhibition zone diameter (mm) |              |                                                |                                          |
|-------------------------|-------------------------------|--------------|------------------------------------------------|------------------------------------------|
|                         | Standard culture <sup>a</sup> | at the alert | 18 h after the alert, incubation in the device | 3 h after the alert, at room temperature |
| 6                       | 17                            | 19-20        | 20                                             | 18-20                                    |
| 8                       | 23                            | 23-24        | 20-25                                          | 18-20                                    |
| 16                      | 25                            | 24-25        | ND                                             | ND                                       |
| 18                      | 26                            | 24-26        | ND                                             | ND                                       |
| 20                      | 26                            | 24-26        | ND                                             | ND                                       |
| 23                      | 26                            | 25-26        | 22-25                                          | 19-22                                    |

<sup>a</sup> Levofloxacin inhibition zone diameter results for the standard culture were taken from Table 2

ND - Not Determined

The inhibition-zone diameters were determined by at least three independent assays

**Table S7.** Imipenem inhibition zone diameters of *B. anthracis*-positive blood cultures

| Incubation duration (h) | Inhibition zone diameter (mm) |              |                                                |                                          |
|-------------------------|-------------------------------|--------------|------------------------------------------------|------------------------------------------|
|                         | Standard culture <sup>a</sup> | at the alert | 18 h after the alert, incubation in the device | 3 h after the alert, at room temperature |
| 6                       | 31                            | 30           | 31-32                                          | 30-31                                    |
| 8                       | 34                            | 33-36        | 32-35                                          | 33                                       |
| 16                      | 38                            | 37-39        | ND                                             | ND                                       |
| 18                      | 39                            | 37-39        | ND                                             | ND                                       |
| 20                      | 39                            | 37-39        | ND                                             | ND                                       |
| 23                      | 39-40                         | 38-42        | 37-40                                          | 35                                       |

<sup>a</sup> Imipenem inhibition zone diameters results for the standard culture were taken from Table 2

ND - Not Determined

The inhibition-zone diameters were determined by at least three independent assays

**Table S8.** Etest Doxycycline MIC values for *B. anthracis* positive blood cultures

| Incubation duration (h) | MIC (µg/ml)                   |              |                                                |                                          |
|-------------------------|-------------------------------|--------------|------------------------------------------------|------------------------------------------|
|                         | Standard culture <sup>a</sup> | at the alert | 18 h after the alert, incubation in the device | 3 h after the alert, at room temperature |
| 6                       | <0.016                        | ≤0.016       | 0.016                                          | 0.016                                    |
| 8                       | ≤0.016                        | ≤0.016       | 0.016                                          | 0.016                                    |
| 16                      | 0.016-0.06                    | 0.03-0.06    | ND                                             | ND                                       |
| 18                      | 0.016-0.125                   | 0.03-0.06    | ND                                             | ND                                       |
| 20                      | 0.06-0.125                    | 0.03-0.06    | ND                                             | ND                                       |
| 23                      | 0.06-0.125                    | 0.06-0.125   | 0.06-0.125                                     | 0.06                                     |

<sup>a</sup> Doxycycline MIC values for the standard culture were taken from Table 3

ND - Not Determined

The MIC values were determined by at least three independent assays

**Table S9.** Etest Ampicillin MIC values for *B. anthracis* positive blood cultures

| Incubation duration (h) | MIC (µg/ml)                   |              |                                                |                                          |
|-------------------------|-------------------------------|--------------|------------------------------------------------|------------------------------------------|
|                         | Standard culture <sup>a</sup> | at the alert | 18 h after the alert, incubation in the device | 3 h after the alert, at room temperature |
| 6                       | 0.03-0.06                     | 0.03-0.125   | 0.06                                           | 0.06                                     |
| 8                       | 0.03-0.06                     | 0.03-0.06    | 0.06                                           | 0.06                                     |
| 16                      | 0.06-0.125                    | 0.06         | ND                                             | ND                                       |
| 18                      | 0.06-0.125                    | 0.06         | ND                                             | ND                                       |
| 20                      | 0.06-0.125                    | 0.06         | ND                                             | ND                                       |
| 23                      | 0.06-0.125                    | 0.06         | 0.125                                          | 0.125                                    |

<sup>a</sup> Ampicillin MIC values for the standard culture were taken from Table 3

ND - Not Determined

The MIC values were determined by at least three independent assays

**Table S10.** Etest Clarithromycin MIC values for *B. anthracis* positive blood cultures

| Incubation duration (h) | MIC (µg/ml)                   |              |                                                |                                          |
|-------------------------|-------------------------------|--------------|------------------------------------------------|------------------------------------------|
|                         | Standard culture <sup>a</sup> | at the alert | 18 h after the alert, incubation in the device | 3 h after the alert, at room temperature |
| 6                       | 0.25-0.5                      | 0.125-0.25   | 0.25                                           | 0.25                                     |
| 8                       | 0.25-0.5                      | 0.125-0.25   | 0.125-0.25                                     | 0.25                                     |
| 16                      | 0.25                          | 0.25         | ND                                             | ND                                       |
| 18                      | 0.25                          | 0.25         | ND                                             | ND                                       |
| 20                      | 0.25                          | 0.25         | ND                                             | ND                                       |
| 23                      | 0.25-0.5                      | 0.125-0.25   | 0.25-0.5                                       | 0.5                                      |

<sup>a</sup> Clarithromycin MIC values for the standard culture were taken from Table 3

ND - Not Determined

The MIC values were determined by at least three independent assays

**Table S11.** Etest Chloramphenicol MIC values for *B. anthracis* positive blood cultures

| Incubation duration (h) | MIC (µg/ml)                   |              |                                                |                                          |
|-------------------------|-------------------------------|--------------|------------------------------------------------|------------------------------------------|
|                         | Standard culture <sup>a</sup> | at the alert | 18 h after the alert, incubation in the device | 3 h after the alert, at room temperature |
| 6                       | 4-8                           | 2-4          | 2-4                                            | 4                                        |
| 8                       | 4-8                           | 2-4          | 2-4                                            | 4-8                                      |
| 16                      | 4                             | 4-8          | ND                                             | ND                                       |
| 18                      | 4-8                           | 4-8          | ND                                             | ND                                       |
| 20                      | 4-8                           | 8            | ND                                             | ND                                       |
| 23                      | 8                             | 4-8          | 4-8                                            | 4-8                                      |

<sup>a</sup> Chloramphenicol MIC values for the standard culture were taken from Table 3

ND - Not Determined

The MIC values were determined by at least three independent assays

**Table S12.** Etest Clindamycin MIC values for *B. anthracis* positive blood cultures

| Incubation duration (h) | MIC (µg/ml)                   |              |                                                |                                          |
|-------------------------|-------------------------------|--------------|------------------------------------------------|------------------------------------------|
|                         | Standard culture <sup>a</sup> | at the alert | 18 h after the alert, incubation in the device | 3 h after the alert, at room temperature |
| 6                       | 0.125-0.5                     | 0.06-0.125   | 0.25                                           | 0.125                                    |
| 8                       | 0.125-0.5                     | 0.125        | 0.125-0.25                                     | 0.125                                    |
| 16                      | 0.25-0.5                      | 0.25         | ND                                             | ND                                       |
| 18                      | 0.25-0.5                      | 0.125        | ND                                             | ND                                       |
| 20                      | 0.25-0.5                      | 0.125        | ND                                             | ND                                       |
| 23                      | 0.25-0.5                      | 0.125-0.25   | 0.125-0.25                                     | 0.125                                    |

<sup>a</sup> Clindamycin MIC values for the standard culture were taken from Table 3

ND - Not Determined

The MIC values were determined by at least three independent assays

**Table S13.** Etest Vancomycin MIC values for *B. anthracis* positive blood cultures

| Incubation duration (h) | MIC (µg/ml)                   |              |
|-------------------------|-------------------------------|--------------|
|                         | Standard culture <sup>a</sup> | at the alert |
| 6                       | 0.125                         | ND           |
| 8                       | 0.25                          | ND           |
| 16                      | 1                             | 1-2          |
| 18                      | 1-2                           | 1-2          |
| 20                      | 1-2                           | 1-2          |
| 23                      | 1-2                           | 1-2          |

<sup>a</sup> Vancomycin MIC values for the standard culture were taken from Table 3

ND - Not Determined

The MIC values were determined by at least three independent assays

**Table S14.** Etest Rifampicin MIC values for *B. anthracis* positive blood cultures

| Incubation duration (h) | MIC (µg/ml)                   |              |
|-------------------------|-------------------------------|--------------|
|                         | Standard culture <sup>a</sup> | at the alert |
| 6                       | 0.03-0.06                     | ND           |
| 8                       | 0.03-0.125                    | ND           |
| 16                      | 0.25-0.5                      | 0.25         |
| 18                      | 0.25-0.5                      | 0.25         |
| 20                      | 0.5                           | 0.25         |
| 23                      | 0.25-0.5                      | 0.25         |

<sup>a</sup> Rifampicin MIC values for the standard culture were taken from Table 3

ND-Not Determined

The MIC values were determined by at least three independent assays

**Table S15.** Tetracycline inhibition zone diameters of *Y. pestis*-positive blood cultures

| Incubation duration (h) | Inhibition zone diameter (mm) |              |                                                |                                          |
|-------------------------|-------------------------------|--------------|------------------------------------------------|------------------------------------------|
|                         | Standard culture <sup>a</sup> | at the alert | 18 h after the alert, incubation in the device | 3 h after the alert, at room temperature |
| 18                      | 28                            | 27-29        | 29-30                                          | 27-29                                    |
| 20                      | 29-30                         | 30           | 30-32                                          | 28-29                                    |
| 22                      | 30                            | 29-30        | 30                                             | 29                                       |
| 24                      | 30-32                         | 31           | 30-31                                          | 29-30                                    |

<sup>a</sup> Tetracycline inhibition zone diameters for the standard culture were taken from Table 7

The inhibition zone diameters were determined by at least three independent assays

**Table S16.** Gentamicin inhibition zone diameters of *Y. pestis*-positive blood cultures

| Incubation duration (h) | Inhibition zone diameter (mm) |              |                                                |                                          |
|-------------------------|-------------------------------|--------------|------------------------------------------------|------------------------------------------|
|                         | Standard culture <sup>a</sup> | at the alert | 18 h after the alert, incubation in the device | 3 h after the alert, at room temperature |
| 18                      | 27-28                         | 26-29        | 27-30                                          | 27-29                                    |
| 20                      | 28-30                         | 26-30        | 27-30                                          | 27-29                                    |
| 22                      | 28-29                         | 27-30        | 28-30                                          | 27-29                                    |
| 24                      | 28-30                         | 30           | 28-30                                          | 28-29                                    |

<sup>a</sup> Gentamicin inhibition zone diameters for the standard culture were taken from Table 7

The inhibition-zone diameters were determined by at least three independent assays

**Table S17.** Chloramphenicol inhibition zone diameters of *Y. pestis*-positive blood cultures

| Incubation duration (h) | Inhibition zone diameter (mm) |              |                                                |                                          |
|-------------------------|-------------------------------|--------------|------------------------------------------------|------------------------------------------|
|                         | Standard culture <sup>a</sup> | at the alert | 18 h after the alert, incubation in the device | 3 h after the alert, at room temperature |
| 18                      | 31-36                         | 34-35        | 32-35                                          | 33-34                                    |
| 20                      | 30-35                         | 35           | 35                                             | 34                                       |
| 22                      | 31-36                         | 32-35        | 35                                             | 31                                       |
| 24                      | 30-35                         | 35           | 35                                             | 31-35                                    |

<sup>a</sup> Chloramphenicol inhibition zone diameters for the standard culture were taken from Table 7

The inhibition-zone diameters were determined by at least three independent assays

**Table S18.** Trimethoprim-Sulfamethoxazole inhibition zone diameters of *Y. pestis*-positive blood cultures

| Incubation duration (h) | Inhibition zone diameter (mm) |              |                                                |                                          |
|-------------------------|-------------------------------|--------------|------------------------------------------------|------------------------------------------|
|                         | Standard culture <sup>a</sup> | at the alert | 18 h after the alert, incubation in the device | 3 h after the alert, at room temperature |
| 18                      | 40-42                         | 41-42        | 39-43                                          | 40-43                                    |
| 20                      | 40-42                         | 42-43        | 39-43                                          | 40-43                                    |
| 22                      | 40-42                         | 42-44        | 39-43                                          | 40-43                                    |
| 24                      | 39-42                         | 44           | 40-43                                          | 40-43                                    |

<sup>a</sup> Trimethoprim-Sulfamethoxazole inhibition zone diameters for the standard culture were taken from Table 7  
The inhibition-zone diameters were determined by at least three independent assays

**Table S19.** Doxycycline Etest MIC values of *Y. pestis*-positive blood cultures

| Incubation duration (h) | MIC (µg/ml)                   |              |                                                |                                          |
|-------------------------|-------------------------------|--------------|------------------------------------------------|------------------------------------------|
|                         | Standard culture <sup>a</sup> | at the alert | 18 h after the alert, incubation in the device | 3 h after the alert, at room temperature |
| 18                      | 1-2                           | 1-2          | 1-2                                            | 1-2                                      |
| 20                      | 1-2                           | 1-2          | 1-2                                            | 1-2                                      |
| 22                      | 1-2                           | 1-2          | 1-2                                            | 1-2                                      |
| 24                      | 1-2                           | 1            | 1-2                                            | 1-2                                      |

<sup>a</sup> Doxycycline MIC values for the standard culture were taken from Table 8  
The MIC values were determined by at least three independent assays

**Table S20.** Chloramphenicol Etest MIC values of *Y. pestis*-positive blood cultures

| Incubation duration (h) | MIC (µg/ml)                   |              |                                                |                                          |
|-------------------------|-------------------------------|--------------|------------------------------------------------|------------------------------------------|
|                         | Standard culture <sup>a</sup> | at the alert | 18 h after the alert, incubation in the device | 3 h after the alert, at room temperature |
| 18                      | 2-4                           | 2            | 2-4                                            | 2-4                                      |
| 20                      | 2-4                           | 2            | 2-4                                            | 2-4                                      |
| 22                      | 2-4                           | 2            | 2-4                                            | 2-4                                      |
| 24                      | 2-4                           | 2            | 2-4                                            | 4                                        |

<sup>a</sup> Chloramphenicol MIC values for the standard culture were taken from Table 8  
The MIC values were determined by at least three independent assays

**Table S21.** Trimethoprim-Sulfamethoxazole Etest MIC values of *Y. pestis*-positive blood cultures

| Incubation duration (h) | MIC (µg/ml)                   |              |                                                |                                          |
|-------------------------|-------------------------------|--------------|------------------------------------------------|------------------------------------------|
|                         | Standard culture <sup>a</sup> | at the alert | 18 h after the alert, incubation in the device | 3 h after the alert, at room temperature |
| 18                      | 0.016-0.03                    | 0.016-0.03   | 0.016-0.03                                     | 0.016-0.03                               |
| 20                      | 0.016-0.03                    | 0.016-0.03   | 0.016-0.03                                     | 0.016-0.03                               |
| 22                      | 0.016-0.03                    | 0.016-0.03   | 0.016-0.03                                     | 0.016-0.03                               |
| 24                      | 0.016-0.03                    | 0.016        | 0.016-0.03                                     | 0.016-0.03                               |

<sup>a</sup> Trimethoprim-Sulfamethoxazole MIC values for the standard culture were taken from Table 8  
The MIC values were determined by at least three independent assays

**Table S22.** Gentamicin Etest MIC values of *Y. pestis*-positive blood cultures

| Incubation duration (h) | MIC (µg/ml)                   |              |                                                |                                          |
|-------------------------|-------------------------------|--------------|------------------------------------------------|------------------------------------------|
|                         | Standard culture <sup>a</sup> | at the alert | 18 h after the alert, incubation in the device | 3 h after the alert, at room temperature |
| 18                      | 0.25-1                        | 0.5          | 0.25-1                                         | 0.25-0.5                                 |
| 20                      | 0.25-1                        | 0.5          | 0.5                                            | 0.25-0.5                                 |
| 22                      | 0.25-1                        | 0.5          | 0.5                                            | 0.25-0.5                                 |
| 24                      | 0.25-1                        | 0.25         | 0.5                                            | 0.25-0.5                                 |

<sup>a</sup> Gentamicin MIC values for the standard culture were taken from Table 8  
The MIC values were determined by at least three independent assays

**Table S23.** Streptomycin Etest MIC values of *Y. pestis*-positive blood cultures

| Incubation duration (h) | MIC (µg/ml)                   |              |                                                |                                          |
|-------------------------|-------------------------------|--------------|------------------------------------------------|------------------------------------------|
|                         | Standard culture <sup>a</sup> | at the alert | 18 h after the alert, incubation in the device | 3 h after the alert, at room temperature |
| 18                      | 1-2                           | 2            | 1-2                                            | 1-2                                      |
| 20                      | 1-2                           | 2            | 1-2                                            | 1-2                                      |
| 22                      | 1-2                           | 2            | 1-2                                            | 1-2                                      |
| 24                      | 1-2                           | 1            | 1-2                                            | 1-2                                      |

<sup>a</sup> Streptomycin MIC values for the standard culture were taken from Table 8

The MIC values were determined by at least three independent assays

**Table S24.** Tetracycline inhibition zone diameters of *F. tularensis*-positive blood cultures

| Incubation duration (h) | Inhibition zone diameter (mm) |              |                                                |                                          |
|-------------------------|-------------------------------|--------------|------------------------------------------------|------------------------------------------|
|                         | Standard culture <sup>a</sup> | at the alert | 18 h after the alert, incubation in the device | 3 h after the alert, at room temperature |
| 24                      | 39-40                         | 40           | 39-40                                          | 38-40                                    |
| 30-40                   | 40-41                         | 40           | 40                                             | 40                                       |
| 48                      | 40-42                         | 40-41        | 40-41                                          | 40-41                                    |

<sup>a</sup> Tetracycline inhibition zone diameters results for the standard culture were taken from Table 12

The inhibition zone diameters were determined by at least three independent assays

**Table S25.** Chloramphenicol inhibition zone diameters of *F. tularensis*-positive blood cultures

| Incubation duration (h) | Inhibition zone diameter (mm) |              |                                                |                                          |
|-------------------------|-------------------------------|--------------|------------------------------------------------|------------------------------------------|
|                         | Standard culture <sup>a</sup> | at the alert | 18 h after the alert, incubation in the device | 3 h after the alert, at room temperature |
| 24                      | 40-41                         | 40-41        | 40                                             | 40                                       |
| 30-40                   | 41-43                         | 40-43        | 41-42                                          | 41-43                                    |
| 48                      | 40-43                         | 41-43        | 41-42                                          | 41-43                                    |

<sup>a</sup> Chloramphenicol inhibition zone diameters for the standard culture were taken from Table 12

The inhibition zone diameters were determined by at least three independent assays

**Table S26.** Gentamicin inhibition zone diameters of *F. tularensis*-positive blood cultures

| Incubation duration (h) | Inhibition zone diameter (mm) |              |                                                |                                          |
|-------------------------|-------------------------------|--------------|------------------------------------------------|------------------------------------------|
|                         | Standard culture <sup>a</sup> | at the alert | 18 h after the alert, incubation in the device | 3 h after the alert, at room temperature |
| 24                      | 23-25                         | 23-25        | 24-26                                          | 23-25                                    |
| 30-40                   | 26-27                         | 26-27        | 26-27                                          | 26-27                                    |
| 48                      | 27-28                         | 28           | 27-28                                          | 28                                       |

<sup>a</sup> Gentamicin inhibition zone diameters for the standard culture were taken from Table 12

The inhibition zone diameters were determined by at least three independent assays

**Table S27.** Doxycycline Etest MIC values of *F. tularensis*-positive blood cultures

| Incubation duration (h) | MIC (µg/ml)                   |              |                                                |                                          |
|-------------------------|-------------------------------|--------------|------------------------------------------------|------------------------------------------|
|                         | Standard culture <sup>a</sup> | at the alert | 18 h after the alert, incubation in the device | 3 h after the alert, at room temperature |
| 24                      | 0.25                          | 0.25-0.5     | 0.25                                           | 0.25-0.5                                 |
| 30-40                   | 0.25-0.5                      | 0.25-0.5     | 0.25-0.5                                       | 0.25-0.5                                 |
| 48                      | 0.25-0.5                      | 0.5          | 0.25-0.5                                       | 0.25-0.5                                 |

<sup>a</sup> Doxycycline MIC values for the standard culture were taken from Table 13

The MIC values were determined by at least three independent assays

**Table S28.** Chloramphenicol Etest MIC values of *F. tularensis*-positive blood cultures

| Incubation duration (h) | MIC (µg/ml)                   |              |                                                |                                          |
|-------------------------|-------------------------------|--------------|------------------------------------------------|------------------------------------------|
|                         | Standard culture <sup>a</sup> | at the alert | 18 h after the alert, incubation in the device | 3 h after the alert, at room temperature |
| 24                      | 0.5-1                         | 0.5          | 0.5-1                                          | 0.5-1                                    |
| 30-40                   | 0.5-1                         | 0.5          | 0.5                                            | 0.5                                      |
| 48                      | 0.5                           | 0.5          | 0.5-1                                          | 0.5-1                                    |

<sup>a</sup>Chloramphenicol MIC values for the standard culture were taken from Table 13

The MIC values were determined by at least three independent assays

**Table S29.** Gentamicin Etest MIC values of *F. tularensis*-positive blood cultures

| Incubation duration (h) | MIC (µg/ml)                   |              |                                                |                                          |
|-------------------------|-------------------------------|--------------|------------------------------------------------|------------------------------------------|
|                         | Standard culture <sup>a</sup> | at the alert | 18 h after the alert, incubation in the device | 3 h after the alert, at room temperature |
| 24                      | 0.5-1                         | 0.5-1        | 1                                              | 1                                        |
| 30-40                   | 0.5-1                         | 0.25-1       | 0.5-1                                          | 0.5-1                                    |
| 48                      | 0.5-1                         | 0.25-1       | 0.5-1                                          | 0.5                                      |

<sup>a</sup>Gentamicin MIC values for the standard culture were taken from Table 13

The MIC values were determined by at least three independent assays

**Table S30.** Streptomycin Etest MIC values of *F. tularensis*-positive blood cultures

| Incubation duration (h) | MIC (µg/ml)                   |              |                                                |                                          |
|-------------------------|-------------------------------|--------------|------------------------------------------------|------------------------------------------|
|                         | Standard culture <sup>a</sup> | at the alert | 18 h after the alert, incubation in the device | 3 h after the alert, at room temperature |
| 24                      | 2-4                           | 2-4          | 2-4                                            | 2                                        |
| 30-40                   | 2-4                           | 1-4          | 2-4                                            | 1-2                                      |
| 48                      | 2-4                           | 1-4          | 2-4                                            | 1-2                                      |

<sup>a</sup>Streptomycin MIC values for the standard culture were taken from Table 13

The MIC values were determined by at least three independent assays
